# Supplementary material
Source: PubMed Central journal article supplement (PMC7716146)
Supplement: ajcr0010-3935-f5.pdf [file ajcr0010-3935-f5.pdf]

# Multiple myeloma metabolic biomarkers

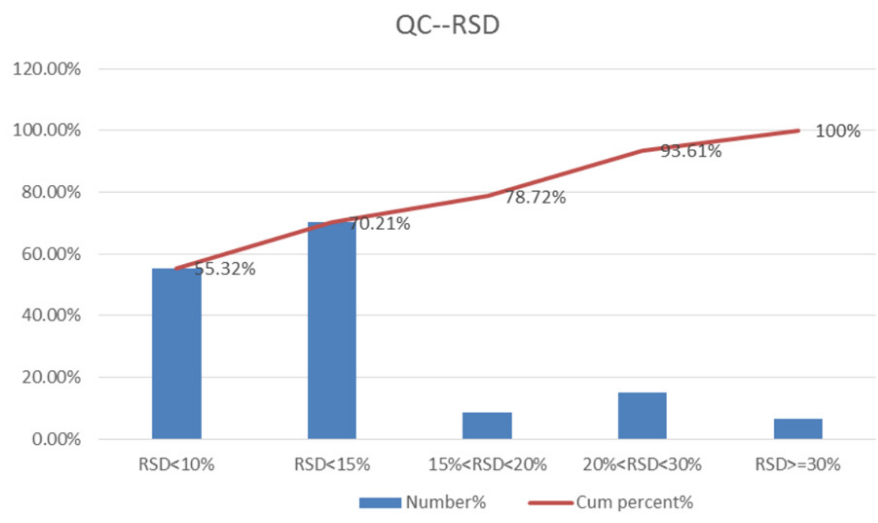

Figure S1. The distributions of relative standard deviation (RSD) of metabolites in all QC samples.

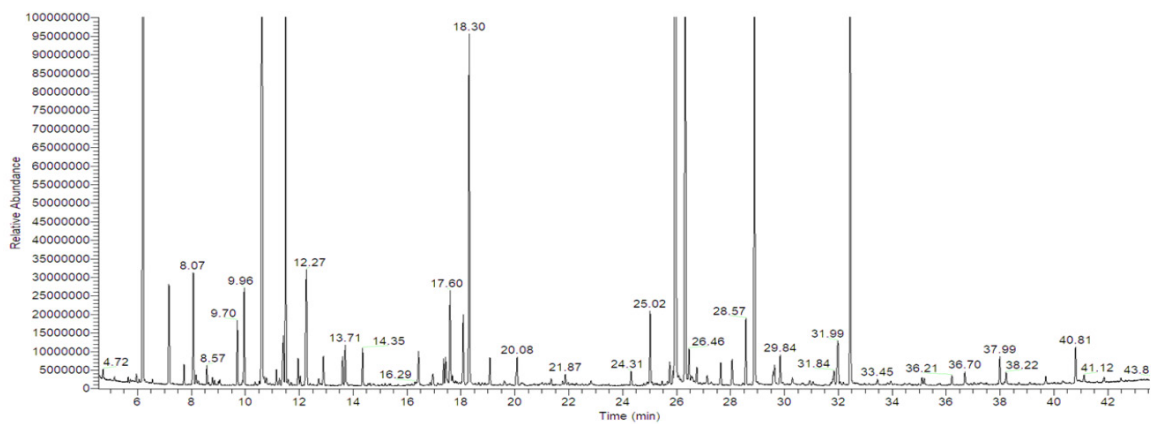

Figure S2. Typical total ion chromatograms from GC-MS analysis of serum.

## Multiple myeloma metabolic biomarkers

**Table S1.** 29 metabolites in discover validation set

| Material            | t.stat  | p.value    | FDR (0.05) |
|---------------------|---------|------------|------------|
| Myristic acid       | 19.508  | 2.50E-19   | 1.17E-17   |
| L-Hydroxyproline    | 17.219  | 9.66E-18   | 2.27E-16   |
| Cysteine            | 14.162  | 2.48E-15   | 3.08E-14   |
| Palmitic Acid       | 14.132  | 2.62E-15   | 3.08E-14   |
| L-Leucine           | 12.839  | 3.62E-14   | 3.40E-13   |
| Stearic acid        | 11.441  | 7.63E-13   | 5.98E-12   |
| L-Methionine        | 9.2833  | 1.35E-10   | 9.09E-10   |
| L-Phenylalanine     | -8.88   | 3.81E-10   | 2.24E-09   |
| Serine              | -8.7291 | 5.65E-10   | 2.68E-09   |
| Glycerol            | 8.7258  | 5.70E-10   | 2.68E-09   |
| L-Isoleucine        | -8.6099 | 7.72E-10   | 3.30E-09   |
| Tyrosine            | 8.0702  | 3.25E-09   | 1.27E-08   |
| L-Valine            | -6.4519 | 2.95E-07   | 1.07E-06   |
| Citric acid         | 6.1611  | 6.81E-07   | 2.29E-06   |
| L-Threonine         | -5.8358 | 1.75E-06   | 5.47E-06   |
| Myo-Inositol-2      | 5.7456  | 2.27E-06   | 6.67E-06   |
| Oxalic acid         | 5.6618  | 2.90E-06   | 8.01E-06   |
| Beta-Alanine        | 5.0548  | 1.69E-05   | 4.43E-05   |
| Glycine             | -4.2308 | 0.00018236 | 0.00045111 |
| Glycolic acid       | -3.9263 | 0.00043059 | 0.0010119  |
| Asparagine          | -3.6163 | 0.0010151  | 0.0022718  |
| Hypotaurine         | 3.1654  | 0.0033892  | 0.0072407  |
| 9-Octadecenoic acid | -2.9115 | 0.0065028  | 0.013288   |
| N-a-Acetyl-L-Lysine | 2.7004  | 0.010977   | 0.020666   |
| Lactic Acid         | -2.6998 | 0.010992   | 0.020666   |
| Urea                | -2.5597 | 0.015404   | 0.027845   |
| Maltose             | 2.5415  | 0.016083   | 0.027997   |
| Malic acid          | 2.4923  | 0.018062   | 0.030318   |
| Xylitol             | -2.3831 | 0.023275   | 0.037722   |

## Multiple myeloma metabolic biomarkers

**Table S2.** 27 metabolites in external validation set

| Material            | t.stat  | p.value  | FDR (0.05)  |
|---------------------|---------|----------|-------------|
| Myristic acid       | 12.436  | 9.54E-18 | 2.77E-16    |
| L-Hydroxyproline    | 11.934  | 5.15E-17 | 7.46E-16    |
| Citric acid         | 11.71   | 1.10E-16 | 1.07E-15    |
| Palmitic Acid       | 10.951  | 1.54E-15 | 1.11E-14    |
| Stearic acid        | 9.1236  | 1.14E-12 | 6.61E-12    |
| Glycerol            | 9.0714  | 1.38E-12 | 6.68E-12    |
| L-Phenylalanine     | -8.4782 | 1.27E-11 | 5.27E-11    |
| Serine              | -7.7635 | 1.90E-10 | 6.23E-10    |
| L-Isoleucine        | -7.7583 | 1.93E-10 | 6.23E-10    |
| L-Leucine           | 6.7024  | 1.07E-08 | 3.11E-08    |
| Cysteine            | 6.0579  | 1.22E-07 | 0.000000323 |
| Tyrosine            | 5.9053  | 2.17E-07 | 0.000000524 |
| L-Valine            | -5.5403 | 8.40E-07 | 0.00000187  |
| 9-Octadecenoic acid | -5.3738 | 1.55E-06 | 0.00000321  |
| L-Methionine        | 5.1219  | 3.86E-06 | 0.00000747  |
| L-Threonine         | -5.0948 | 4.26E-06 | 0.00000771  |
| Oxalic acid         | 5.0786  | 4.52E-06 | 0.00000771  |
| Beta-Alanine        | 4.8798  | 9.20E-06 | 0.0000148   |
| Myo-Inositol-2      | 4.4941  | 3.55E-05 | 0.0000542   |
| Glycolic acid       | -3.7914 | 3.69E-04 | 0.00052888  |
| hypotaurine         | 3.7797  | 3.83E-04 | 0.00052888  |
| Malic acid          | 3.3886  | 1.29E-03 | 0.0017034   |
| Asparagine          | -3.0327 | 3.67E-03 | 0.0046263   |
| Glycine             | -2.7577 | 7.85E-03 | 0.009481    |
| Urea                | -2.6707 | 9.89E-03 | 0.011471    |
| Maltose             | 2.3089  | 2.47E-02 | 0.027507    |
| Xylitol             | -2.1179 | 3.86E-02 | 0.041499    |

## Multiple myeloma metabolic biomarkers

**Table S3.** The association between metabolites and clinical characteristics among the patients with MM

| Clinical Characters       | n  | Oxalic acid         |         | Urea                   |         | Glycolic acid    |         | Serine            |         | L-Phenylalanine    |         | Malic acid       |         |
|---------------------------|----|---------------------|---------|------------------------|---------|------------------|---------|-------------------|---------|--------------------|---------|------------------|---------|
|                           |    | Median (p25-p75)    | P value | Median (p25-p75)       | P value | Median (p25-p75) | P value | Median (p25-p75)  | P value | Median (p25-p75)   | P value | Median (p25-p75) | P value |
| Sex (n=55)                |    |                     |         |                        |         |                  |         |                   |         |                    |         |                  |         |
| Male                      | 34 | 11.92 (8.16~15.96)  | 0.038*  | 222.66 (182.86~299.35) | 0.038*  | 0.34 (0.2~1.2)   | 0.51    | 8.93 (5.26~10.06) | 0.377   | 9.3 (7.84~12.71)   | 0.386   | 0.05 (0.03~0.08) | 0.146   |
| Female                    | 21 | 16.96 (10.69~23.57) |         | 171.08 (130.29~266.25) |         | 0.3 (0.15~0.59)  |         | 6.06 (4.44~10.24) |         | 8.67 (6.27~12.88)  |         | 0.04 (0.03~0.06) |         |
| Karyotype (n=55)          |    |                     |         |                        |         |                  |         |                   |         |                    |         |                  |         |
| Abnormal                  | 11 | 12.83 (6.49, 17.10) | 0.487   | 235.4 (181.76~304.57)  | 0.247   | 0.35 (0.18~1.36) | 0.643   | 5.13 (4.81~6.44)  | 0.016   | 7.34 (6.29~10.78)  | 0.053   | 0.03 (0.02~0.07) | 0.313   |
| Normal                    | 44 | 12.71 (9.39~19.96)  |         | 194.8 (153.63~273.23)  |         | 0.32 (0.19~0.93) |         | 9.04 (5.68~10.53) |         | 9.72 (8.02~13.86)  |         | 0.04 (0.03~0.07) |         |
| 13q14 deletion (n=55)     |    |                     |         |                        |         |                  |         |                   |         |                    |         |                  |         |
| Yes                       | 3  | 17.85 (6.24~)       | 0.661   | 184.61 (109.51~)       | 0.324   | 0.38 (0.34~)     | 0.342   | 10 (5.58~)        | 0.272   | 10.05 (8.98~)      | 0.342   | 0.03 (0.03~)     | 0.635   |
| No                        | 52 | 12.65 (8.60~17.55)  |         | 208.36 (155.42~297.49) |         | 0.32 (0.19~1.00) |         | 7.14 (5.01~9.86)  |         | 8.77 (6.65~12.43)  |         | 0.04 (0.03~0.07) |         |
| Rb1 deletion (n=55)       |    |                     |         |                        |         |                  |         |                   |         |                    |         |                  |         |
| Yes                       | 2  | 15.85 (6.24~)       | 0.982   | 152.97 (109.51~)       | 0.345   | 0.85 (0.34~)     | 0.366   | 7.84 (5.68~)      | 0.842   | 9.52 (8.98~)       | 0.875   | 0.03 (0.32~)     | 0.486   |
| No                        | 53 | 12.83 (8.76~17.74)  |         | 206.5 (156.82~297.36)  |         | 0.32 (0.19~0.97) |         | 7.24 (5.03~10.05) |         | 8.79 (6.71~12.86)  |         | 0.04 (0.03~0.07) |         |
| 1q21 amplification (n=55) |    |                     |         |                        |         |                  |         |                   |         |                    |         |                  |         |
| Yes                       | 6  | 10.4 (6.30~26.88)   | 0.645   | 243.17 (115.51~489.26) | 0.703   | 0.34 (0.21~0.49) | 0.885   | 4.96 (3.87~5.53)  | 0.010*  | 6.81 (6.00~8.37)   | 0.034*  | 0.03 (0.02~0.07) | 0.282   |
| No                        | 49 | 12.94 (9.19~17.74)  |         | 205.49 (156.82~280.79) |         | 0.32 (0.19~1.19) |         | 8.87 (5.22~10.32) |         | 9.43 (7.44~13.45)  |         | 0.04 (0.03~0.07) |         |
| IgH (n=55)                |    |                     |         |                        |         |                  |         |                   |         |                    |         |                  |         |
| Abnormal                  | 11 | 12.45 (6.59~17.85)  | 0.487   | 205.49 (184.41~478.24) | 0.23    | 0.38 (0.29~1.22) | 0.199   | 9.53 (5.49~10.00) | 0.501   | 10.23 (6.12~14.04) | 0.784   | 0.05 (0.02~0.10) | 0.9     |
| Normal                    | 44 | 13.33 (9.39~19.90)  |         | 201.95 (153.63~273.23) |         | 0.31 (0.18~0.85) |         | 7.03 (5.01~10.14) |         | 8.77 (6.84~12.43)  |         | 0.04 (0.03~0.07) |         |
| FISH (n=55)               |    |                     |         |                        |         |                  |         |                   |         |                    |         |                  |         |
| Abnormal                  | 15 | 12.45 (6.49~24.71)  | 0.545   | 196.43 (146.50~412.16) | 0.623   | 0.35 (0.29~1.02) | 0.257   | 6.06 (4.81~9.77)  | 0.637   | 8.98 (6.29~10.88)  | 0.65    | 0.05 (0.03~0.08) | 0.806   |
| Normal                    | 40 | 13.33 (9.78~17.55)  |         | 208.36 (155.42~273.23) |         | 0.29 (0.18~1.05) |         | 7.75 (5.08~10.38) |         | 8.98 (6.84~13.02)  |         | 0.04 (0.03~0.07) |         |
| light.chain (n=55)        |    |                     |         |                        |         |                  |         |                   |         |                    |         |                  |         |
| Abnormal                  | 50 | 12.64 (8.18~18.55)  | 0.521   | 201.44 (153.89~298.01) | 0.619   | 0.33 (0.19~1.06) | 0.599   | 7.03 (5.05~9.92)  | 0.244   | 8.88 (6.56~12.17)  | 0.282   | 0.04 (0.03~0.07) | 0.831   |
| Normal                    | 5  | 14 (12.09~18.96)    |         | 206.5 (132.21~250.96)  |         | 0.43 (0.21~1.18) |         | 9.64 (6.80~13.97) |         | 11.71 (7.80~16.19) |         | 0.04 (0.03~0.06) |         |
| Renal.function (n=55)     |    |                     |         |                        |         |                  |         |                   |         |                    |         |                  |         |
| Yes                       | 10 | 11.01 (6.23~13.21)  | 0.029   | 323.4 (193.49~499.17)  | 0.047   | 0.29 (0.17~0.74) | 0.711   | 6.99 (4.40~10.02) | 0.6     | 9.51 (6.56~15.46)  | 0.793   | 0.06 (0.03~0.09) | 0.214   |
| No                        | 45 | 14.47 (9.19~21.04)  |         | 193.16 (150.00~270.99) |         | 0.33 (0.19~1.19) |         | 7.24 (5.22~10.11) |         | 8.98 (6.71~12.30)  |         | 0.04 (0.03~0.06) |         |
| Bone.destruction (n=55)   |    |                     |         |                        |         |                  |         |                   |         |                    |         |                  |         |
| Yes                       | 49 | 12.83 (8.76~17.74)  | 0.906   | 197.4 (156.82~291.61)  | 0.645   | 0.34 (0.23~1.19) | 0.015*  | 8.63 (5.39~10.11) | 0.025*  | 9.43 (7.91~12.86)  | 0.032*  | 0.04 (0.03~0.07) | 0.011*  |
| No                        | 6  | 12.86 (8.12~23.54)  |         | 229.81 (117.14~579.67) |         | 0.12 (0.08~0.30) |         | 3.32 (2.46~8.04)  |         | 5.97 (3.47~9.77)   |         | 0.02 (0.01~0.04) |         |

\*indicates p<0.05.

## Multiple myeloma metabolic biomarkers

**Table S4.** The models consisting of clinical characteristics combined with all single significant biomarkers (selected by P<0.1) on the treatment outcome

| Variable                                       | Univariate              |            | Multivariate           |            | Multivariate            |            | Multivariate           |            | Multivariate           |            | Multivariate           |            |
|------------------------------------------------|-------------------------|------------|------------------------|------------|-------------------------|------------|------------------------|------------|------------------------|------------|------------------------|------------|
|                                                | Odds Ratio<br>(95% CI)  | P<br>value | Odds Ratio<br>(95% CI) | P<br>value | Odds Ratio<br>(95% CI)  | P<br>value | Odds Ratio<br>(95% CI) | P<br>value | Odds Ratio<br>(95% CI) | P<br>value | Odds Ratio<br>(95% CI) | P<br>value |
| Sex (Female vs. Male)                          | 0.73 (0.23, 2.39)       | 0.606      |                        |            |                         |            |                        |            |                        |            |                        |            |
| Age (Continuous)                               | 1.08 (1, 1.18)          | 0.061      | 1.12 (1, 1.24)         | 0.043      | 1.13 (1.01, 1.27)       | 0.038      | 1.1 (0.98, 1.24)       | 0.104      | 1.07 (0.96, 1.2)       | 0.244      | 1.05 (0.92, 1.2)       | 0.487      |
| Karyotype (Abnormal vs. Normal)                | 0.73 (0.17, 3.14)       | 0.667      |                        |            |                         |            |                        |            |                        |            |                        |            |
| 13q14 (Abnormal vs. Normal)                    | 1.03 (0.09, 12.16)      | 0.982      |                        |            |                         |            |                        |            |                        |            |                        |            |
| Rb1 (Abnormal vs. Normal)                      | 2.12 (0.12, 35.93)      | 0.603      |                        |            |                         |            |                        |            |                        |            |                        |            |
| 1q21 (Abnormal vs. Normal)                     | 1.03 (0.17, 6.23)       | 0.973      |                        |            |                         |            |                        |            |                        |            |                        |            |
| IgH (Abnormal vs. Normal)                      | 1.22 (0.31, 4.88)       | 0.774      |                        |            |                         |            |                        |            |                        |            |                        |            |
| FISH (Abnormal vs. Normal)                     | 1.56 (0.45, 5.35)       | 0.483      |                        |            |                         |            |                        |            |                        |            |                        |            |
| Abnormal light chain (Present vs. Not present) | 2.06 (0.21, 19.91)      | 0.532      |                        |            |                         |            |                        |            |                        |            |                        |            |
| Renal fuction (Abnormal vs. Normal)            | 0.86 (0.19, 3.79)       | 0.839      |                        |            |                         |            |                        |            |                        |            |                        |            |
| Bone destruction (Present vs. Not present)     | 0.2 (0.03, 1.22)        | 0.081      | 0.06 (0.01, 0.58)      | 0.015      | 0.06 (0.01, 0.59)       | 0.016      | 0.05 (0, 0.77)         | 0.032      | 0.06 (0, 0.73)         | 0.027      | 0.03 (0, 0.99)         | 0.049      |
| M protein percentage (Continuous)              | 1.91 (0.29, 12.66)      | 0.504      |                        |            |                         |            |                        |            |                        |            |                        |            |
| Total protein (Continuous)                     | 1.01 (0.99, 1.04)       | 0.359      |                        |            |                         |            |                        |            |                        |            |                        |            |
| M protein (Continuous)                         | 1.02 (0.99, 1.05)       | 0.136      |                        |            |                         |            |                        |            |                        |            |                        |            |
| Plasmacyte percentage (Continuous)             | 1.02 (0.99, 1.05)       | 0.171      |                        |            |                         |            |                        |            |                        |            |                        |            |
| Serum creatinine (Continuous)                  | 0.9965 (0.9904, 1.0026) | 0.26       |                        |            |                         |            |                        |            |                        |            |                        |            |
| Hemoglobin (Continuous)                        | 0.9922 (0.9679, 1.0171) | 0.534      |                        |            |                         |            |                        |            |                        |            |                        |            |
| Platelet (Continuous)                          | 0.9986 (0.9896, 1.0078) | 0.766      |                        |            |                         |            |                        |            |                        |            |                        |            |
| Serum Cacium (Continuous)                      | 0.04 (0, 0.84)          | 0.038      | 0.01 (0, 0.59)         | 0.027      | 0.01 (0, 0.84)          | 0.041      | 0.01 (0, 1.19)         | 0.059      | 0.01 (0, 0.95)         | 0.047      | 0.01 (0, 1.58)         | 0.075      |
| Serum beta2-micro (Continuous)                 | 0.95 (0.82, 1.1)        | 0.507      |                        |            |                         |            |                        |            |                        |            |                        |            |
| Albumin (Continuous)                           | 0.92 (0.83, 1.01)       | 0.077      | 0.97 (0.86, 1.1)       | 0.614      | 0.9927 (0.8784, 1.1219) | 0.906      | 0.94 (0.81, 1.09)      | 0.394      | 0.95 (0.83, 1.09)      | 0.502      | 0.92 (0.78, 1.07)      | 0.28       |
| LDH (Continuous)                               | 1.0046 (0.9979, 1.0113) | 0.177      |                        |            |                         |            |                        |            |                        |            |                        |            |
| CRP (Continuous)                               | 1.11 (0.99, 1.24)       | 0.079      | 1.1 (0.97, 1.26)       | 0.151      | 1.08 (0.94, 1.23)       | 0.263      | 1.16 (0.99, 1.37)      | 0.066      | 1.13 (0.97, 1.31)      | 0.126      | 1.21 (1, 1.46)         | 0.05       |
| 24 h urine protein (Continuous)                | 0.55 (0.2, 1.51)        | 0.25       |                        |            |                         |            |                        |            |                        |            |                        |            |
| Beta-Alanine (High vs. Low cutoff =0.388)      | 4.25 (1.05, 17.2)       | 0.043      |                        |            | 3.17 (0.66, 20.84)      | 0.136      |                        |            |                        |            |                        |            |
| Cysteine (High vs. Low cutoff =0.102)          | 4.8 (1.4, 16.46)        | 0.013      |                        |            |                         |            | 11.84 (1.91, 73.59)    | 0.008      |                        |            | 11.78 (1.53, 90.74)    | 0.018      |
| Hypotaurine (High vs. Low cutoff =0.12)        | 6.46 (1.76, 23.71)      | 0.005      |                        |            |                         |            |                        |            | 7.43 (1.38, 40.06)     | 0.02       | 7.06 (0.99, 50.51)     | 0.052      |

## Multiple myeloma metabolic biomarkers

**Table S5.** The models consisting of clinical characteristics combined with all single significant biomarkers (selected by P<0.1) on PFS

| Variable                                       | Univariate                 |         | Multivariate             |         | Multivariate                |         | Multivariate              |         | Multivariate              |         | Multivariate             |         | Multivariate              |         |                            |        |
|------------------------------------------------|----------------------------|---------|--------------------------|---------|-----------------------------|---------|---------------------------|---------|---------------------------|---------|--------------------------|---------|---------------------------|---------|----------------------------|--------|
|                                                | Hazard Ratio (95% CI)      | P value | Hazard Ratio (95% CI)    | P value | Hazard Ratio (95% CI)       | P value | Hazard Ratio (95% CI)     | P value | Hazard Ratio (95% CI)     | P value | Hazard Ratio (95% CI)    | P value | Hazard Ratio (95% CI)     | P value |                            |        |
| Sex (Female vs. Male)                          | 0.6724<br>(0.2106, 2.147)  | 0.503   |                          |         |                             |         |                           |         |                           |         |                          |         |                           |         |                            |        |
| Age (Continuous)                               | 1.002<br>(0.939, 1.069)    | 0.96    |                          |         |                             |         |                           |         |                           |         |                          |         |                           |         |                            |        |
| Karyotype (Abnormal vs. Normal)                | 1.579<br>(0.493, 5.056)    | 0.442   |                          |         |                             |         |                           |         |                           |         |                          |         |                           |         |                            |        |
| 13q14 (Abnormal vs. Normal)                    | 1.841<br>(0.2403, 14.1)    | 0.577   |                          |         |                             |         |                           |         |                           |         |                          |         |                           |         |                            |        |
| Rb1 (Abnormal vs. Normal)                      | 2.958<br>(0.385, 22.73)    | 0.297   |                          |         |                             |         |                           |         |                           |         |                          |         |                           |         |                            |        |
| 1q21 (Abnormal vs. Normal)                     | 2.245<br>(0.6507, 8.454)   | 0.193   |                          |         |                             |         |                           |         |                           |         |                          |         |                           |         |                            |        |
| IgH (Abnormal vs. Normal)                      | 0.9584<br>(0.2672, 3.437)  | 0.948   |                          |         |                             |         |                           |         |                           |         |                          |         |                           |         |                            |        |
| FISH (Abnormal vs. Normal)                     | 1.444<br>(0.4835, 4.312)   | 0.511   |                          |         |                             |         |                           |         |                           |         |                          |         |                           |         |                            |        |
| Abnormal light chain (Present vs. Not present) | 7.8E+07<br>(0, Inf)        | 0.998   |                          |         |                             |         |                           |         |                           |         |                          |         |                           |         |                            |        |
| Renal function (Abnormal vs. Normal)           | 0.3602<br>(0.04709, 2.755) | 0.325   |                          |         |                             |         |                           |         |                           |         |                          |         |                           |         |                            |        |
| Bone destruction (Present vs. Not present)     | 0.5751<br>(0.1281, 2.581)  | 0.47    |                          |         |                             |         |                           |         |                           |         |                          |         |                           |         |                            |        |
| M protein percentage (Continuous)              | 0.8784<br>(0.1527, 5.054)  | 0.885   |                          |         |                             |         |                           |         |                           |         |                          |         |                           |         |                            |        |
| Total protein (Continuous)                     | 1.004<br>(0.9809, 1.027)   | 0.763   |                          |         |                             |         |                           |         |                           |         |                          |         |                           |         |                            |        |
| M protein (Continuous)                         | 0.9999<br>(0.9776, 1.023)  | 0.994   |                          |         |                             |         |                           |         |                           |         |                          |         |                           |         |                            |        |
| Plasmacyte percentage (Continuous)             | 1.027<br>(1.003, 1.053)    | 0.0288  | 1.024<br>(0.9984, 1.049) | 0.0669  | 1.0305<br>(1.00389, 1.0579) | 0.0244  | 1.0211<br>(0.9951, 1.048) | 0.113   | 1.0184<br>(0.9928, 1.045) | 0.1612  | 1.016<br>(0.9879, 1.044) | 0.2736  | 1.0138<br>(0.9863, 1.042) | 0.329   | 1.0229<br>(0.99786, 1.049) | 0.0734 |

## Multiple myeloma metabolic biomarkers

|                                              |                                |         |                             |        |                                |        |                               |       |                              |        |                             |        |                              |       |                               |       |
|----------------------------------------------|--------------------------------|---------|-----------------------------|--------|--------------------------------|--------|-------------------------------|-------|------------------------------|--------|-----------------------------|--------|------------------------------|-------|-------------------------------|-------|
| Serum creatinine (Continuous)                | 0.9999<br>(0.9951,<br>1.005)   | 0.974   |                             |        |                                |        |                               |       |                              |        |                             |        |                              |       |                               |       |
| Hemoglobin (Continuous)                      | 0.9895<br>(0.9665,<br>1.013)   | 0.376   |                             |        |                                |        |                               |       |                              |        |                             |        |                              |       |                               |       |
| Platelet (Continuous)                        | 0.9968<br>(0.9887,<br>1.005)   | 0.44    |                             |        |                                |        |                               |       |                              |        |                             |        |                              |       |                               |       |
| Serum Calcium (Continuous)                   | 0.485<br>(0.05103,<br>4.609)   | 0.529   |                             |        |                                |        |                               |       |                              |        |                             |        |                              |       |                               |       |
| Serum beta2-micro (Continuous)               | 0.9903<br>(0.8537,<br>1.149)   | 0.898   |                             |        |                                |        |                               |       |                              |        |                             |        |                              |       |                               |       |
| Albumin (Continuous)                         | 0.9509<br>(0.8783,<br>1.03)    | 0.214   |                             |        |                                |        |                               |       |                              |        |                             |        |                              |       |                               |       |
| LDH (Continuous)                             | 1.007<br>(1.001,<br>1.012)     | 0.0128  | 1.006<br>(1.0004,<br>1.012) | 0.0352 | 1.005<br>(0.99954,<br>1.0105)  | 0.0724 | 1.0046<br>(0.99873,<br>1.010) | 0.125 | 1.0052<br>(0.9998,<br>1.011) | 0.0606 | 1.006<br>(1.0001,<br>1.012) | 0.0446 | 1.0062<br>(1.0005,<br>1.012) | 0.034 | 1.0045<br>(0.99884,<br>1.010) | 0.12  |
| CRP (Continuous)                             | 1.002<br>(0.9004,<br>1.114)    | 0.975   |                             |        |                                |        |                               |       |                              |        |                             |        |                              |       |                               |       |
| 24 h urine protein (Continuous)              | 1.368<br>(0.6763,<br>2.766)    | 0.384   |                             |        |                                |        |                               |       |                              |        |                             |        |                              |       |                               |       |
| Glycolic acid (High vs. Low cutoff =0.2)     | 0.2313<br>(0.08019,<br>0.6671) | 0.00675 |                             |        | 0.2521<br>(0.08322,<br>0.7639) | 0.0148 |                               |       |                              |        |                             |        |                              |       |                               |       |
| L-Valine (High vs. Low cutoff =6)            | 0.2554<br>(0.07074,<br>0.9221) | 0.0372  |                             |        |                                |        | 0.3761<br>(0.09801,<br>1.443) | 0.154 |                              |        |                             |        |                              |       |                               |       |
| Serine (High vs. Low cutoff =6)              | 0.3255<br>(0.1124,<br>0.9423)  | 0.0385  |                             |        |                                |        |                               |       | 0.5193<br>(0.1618,<br>1.667) | 0.2708 |                             |        |                              |       |                               |       |
| Malic acid (High vs. Low cutoff =0.03)       | 0.3224<br>(0.1127,<br>0.9224)  | 0.0348  |                             |        |                                |        |                               |       |                              |        | 0.456<br>(0.1424,<br>1.461) | 0.1862 |                              |       |                               |       |
| L-Phenylalanine (High vs. Low cutoff =0.102) | 0.3115<br>(0.1083,<br>0.896)   | 0.0305  |                             |        |                                |        |                               |       |                              |        |                             |        | 0.4368<br>(0.1321,<br>1.445) | 0.175 |                               |       |
| Xylitol(High vs. Low cutoff =0.075)          | 0.2328<br>(0.06494,<br>0.8346) | 0.0252  |                             |        |                                |        |                               |       |                              |        |                             |        |                              |       | 0.2789<br>(0.07571,<br>1.028) | 0.055 |
